# Supplementary material for: Protein–Protein Interaction (PPI) Network of Zebrafish Oestrogen Receptors: A Bioinformatics Workflow
Source: MDPI journal article supplement (doi:10.3390/life12050650), 2022-04-27
Supplement: s1 [file s1]

**Figure S1:**

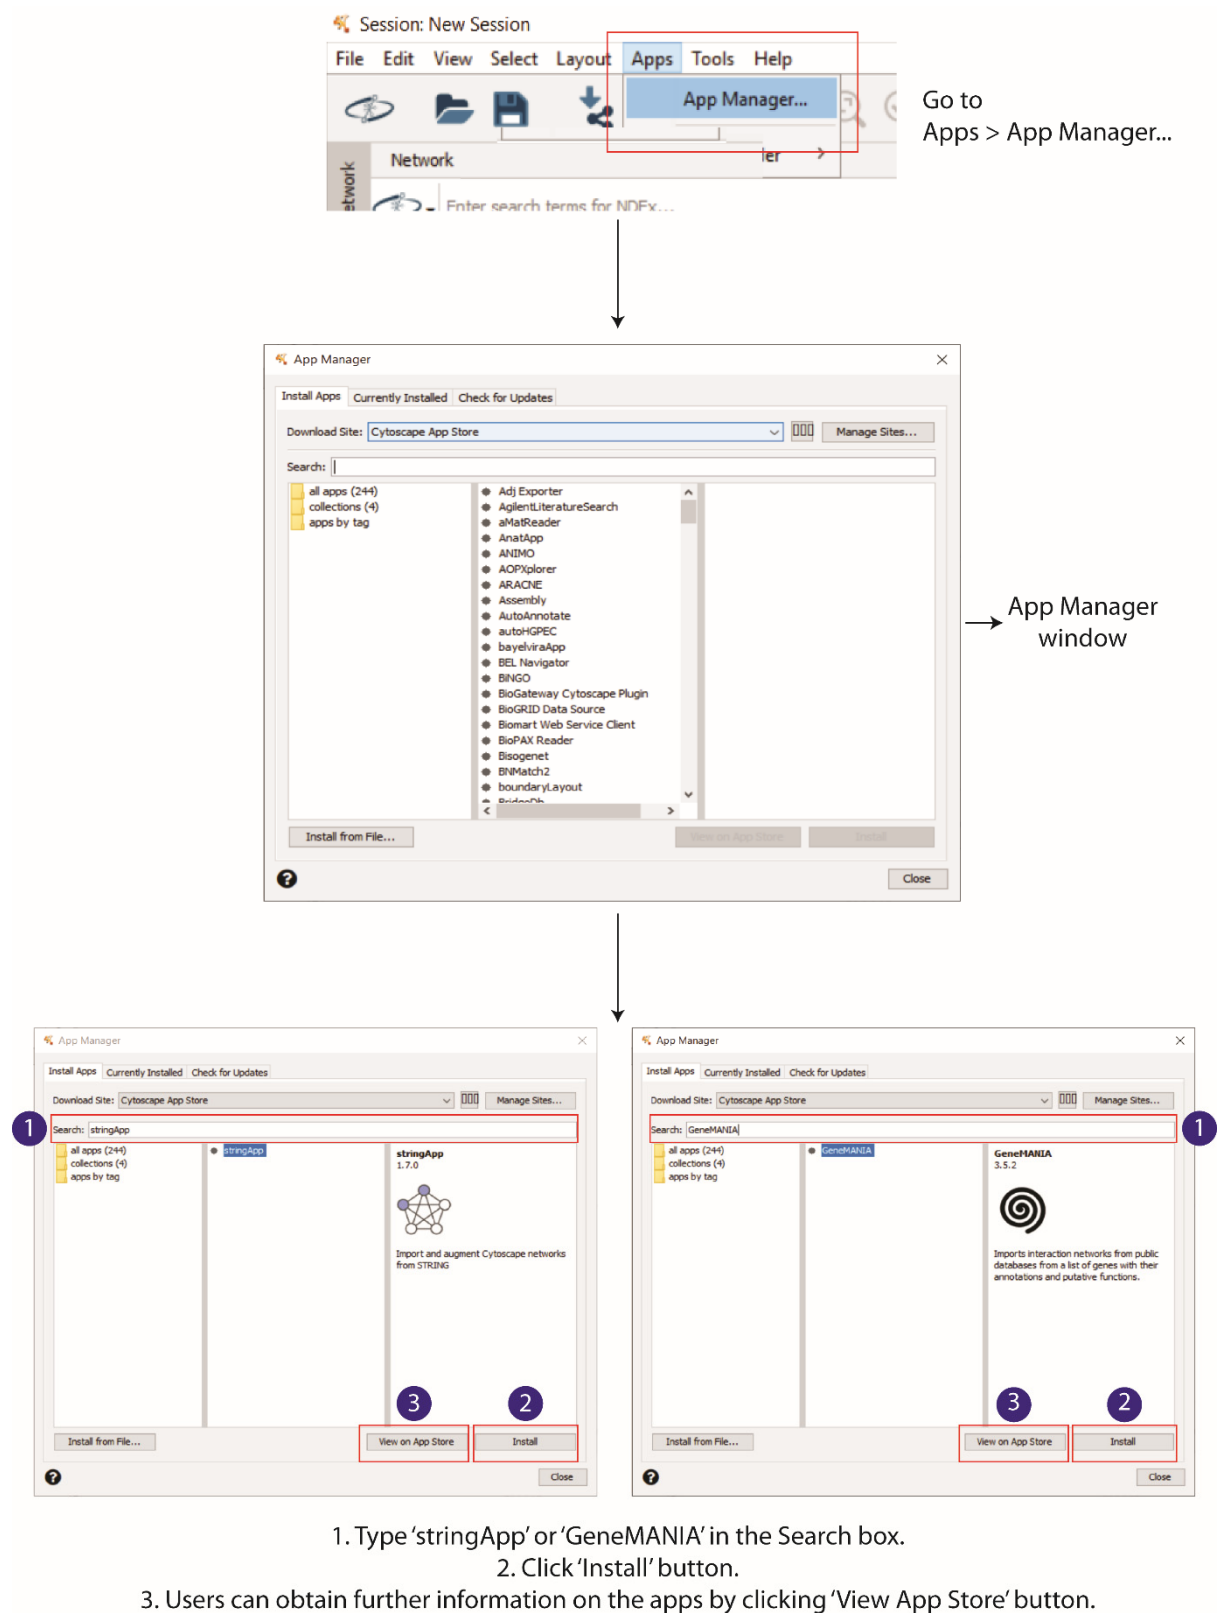

**Figure S1:** Installation of 'stringApp' and 'GeneMania' apps. Users can apply similar steps to install other Cytoscape apps.
