# Supplementary material for: Protein–Protein Interaction (PPI) Network of Zebrafish Oestrogen Receptors: A Bioinformatics Workflow
Source: MDPI journal article supplement (doi:10.3390/life12050650), 2022-04-27
Supplement: s1 [file s1]

**Figure S3:**

1. On the GeneMANIA website, users can insert the list of proteins in the provided box.

2. Select a specific organism.

3. Users can edit the settings of the network.

4. Click 'Search' icon to proceed.

Click on the 'Interactions data' option to download the .txt format.

Go to Cytoscape, click 'File > Import > Network from File'.  
Select the .tsv file that have been downloaded.

This window will appear. User can click on a column to edit the column information.  
Click 'OK' to generate a PPI network.

**Figure S3:** An alternative approach to constructing a PPI network from the GeneMANIA website.
